# Supplementary material for: A fluorescent turn-on probe of naphthalimide for sensitive and specific detection of iodide in neutral aqueous solution and real samples
Source: Royal Society of Chemistry journal article supplement (doi:10.1039/c4ay01865f), 2014-01-01
Supplement: c4ay01865f1.pdf [file c4ay01865f1.pdf]

Supporting Information

# Fluorescence Turn-on Probe of Naphthalimide for Sensitive and Specific Detection of Iodide in Neutral Aqueous Solution and Real Samples

Dandan Li, Xinlei Chen, Yang Li, Tanyu Cheng, Weiping Zhu, Yufang Xu\*, Xuhong Qian\*

State key Laboratory of Bioreactor Engineering, Shanghai Key Laboratory of Chemical Biology, School of Pharmacy, East China University of Science and Technology, Shanghai, 200237, China. Fax: +86 21 6425 2603; Tel: +86 21 6425 3589; *E-mail*: [xhqian@ecsut.edu.cn](mailto:xhqian@ecsut.edu.cn); [yfxu@ecust.edu.cn](mailto:yfxu@ecust.edu.cn).

## **Table of Contents:**

### **1. Materials and Instruments**

### **2. Synthesis**

### **3. Method**

#### **3.1 Spectroscopic materials and methods**

#### **3.2 Job plot**

#### **3.3 Detection of association constant**

#### **3.4 Determination of quantum yield**

#### **3.5 Detection limit**

#### **3.6 Detection iodide in real samples with ANAg**

### **4. Data**

### **5 The characterization data of ANP**

### **6. References**

## 1. Materials and Instruments

Silica gel P60 (Qingdao) was used for column chromatography. All chemicals were purchased from TCI and Aladdin reagent Co without further purification except otherwise stated. All the organic solvents were of analytical grade. Acetonitrile were distilled by  $\text{CaH}_2$  to remove the water before used. Water was purified by a Milli-Q system. The solutions of metal ions were prepared from  $\text{AgClO}_4 \cdot \text{H}_2\text{O}$ ,  $\text{Cu}(\text{ClO}_4)_2 \cdot 6\text{H}_2\text{O}$ ,  $\text{Hg}(\text{ClO}_4)_2 \cdot 3\text{H}_2\text{O}$ ,  $\text{Zn}(\text{ClO}_4)_2 \cdot 6\text{H}_2\text{O}$ ,  $\text{Cd}(\text{ClO}_4)_2 \cdot 6\text{H}_2\text{O}$ ,  $\text{Mg}(\text{ClO}_4)_2$ ,  $\text{Co}(\text{ClO}_4)_2 \cdot 6\text{H}_2\text{O}$ ,  $\text{Ni}(\text{ClO}_4)_2 \cdot 6\text{H}_2\text{O}$ ,  $\text{Ba}(\text{ClO}_4)_2$ ,  $\text{Pb}(\text{ClO}_4)_2 \cdot 3\text{H}_2\text{O}$ ,  $\text{Ca}(\text{ClO}_4)_2 \cdot 4\text{H}_2\text{O}$ ,  $\text{FeSO}_4 \cdot 7\text{H}_2\text{O}$ ,  $\text{FeCl}_3$ ,  $\text{Cr}(\text{ClO}_4)_3 \cdot 6\text{H}_2\text{O}$ ,  $\text{LiClO}_4$ ,  $\text{NaClO}_4$  and  $\text{KClO}_4$  in  $\text{H}_2\text{O}$  and  $\text{Cu}^+(\text{CH}_3\text{CN})_4\text{PF}_6^-$  in  $\text{CH}_3\text{CN}$ . The solutions of anions were prepared from  $\text{KF}$ ,  $\text{NaCl}$ ,  $\text{NaBr}$ ,  $\text{KI}$ ,  $\text{NaNO}_3$ ,  $\text{Na}_2\text{SO}_4$ ,  $\text{NaCO}_3$ ,  $\text{Na}_3\text{PO}_4$ ,  $\text{CH}_3\text{COONa}$  and  $\text{NaHS}$  in Mili Q water. Salt samples were purchased from local markets with the brand of china salt (1 deep well iodized salt, 2 refined salt without iodine, 3 tianshan lake salt, 4 deep well iodine-free salt).

$^1\text{H}$  and  $^{13}\text{C}$  NMR spectra were collected in  $\text{CDCl}_3$  at  $25\text{ }^\circ\text{C}$  on a Bruker AV-400 spectrometer at NMR Facility of East China University of Science and Technology (ECUST), from which chemical shifts reported in ppm (TMS as internal standard). Mass spectral analyses were carried out at the Analysis and Test Center of East China University of Science and Technology (ECUST).

## 2. Synthesis

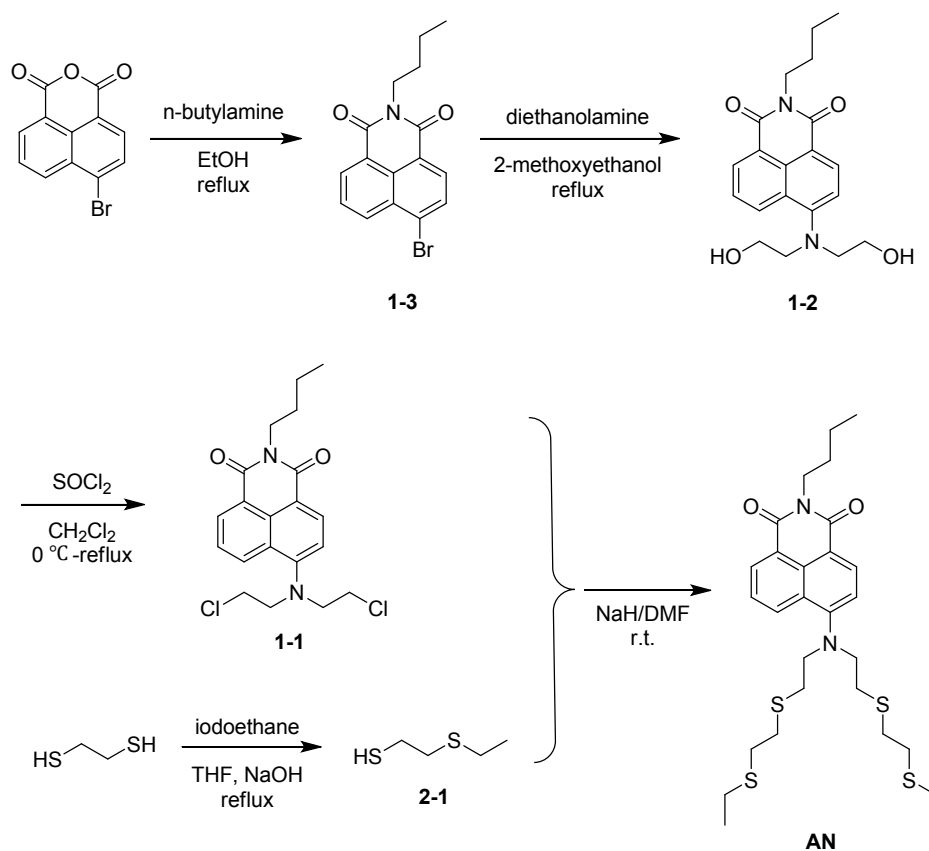

Scheme 1 Synthesis of AN

***N*-butyl-4-bromo-1,8-naphthalimide 1-3<sup>1</sup>:** The solution of 4-bromo -1,8-naphthalic anhydride (5.0 g, 18.1 mmol), *n*-butylamine (2.64 g, 36.1 mmol) in 40 mL of ethanol was heated at reflux for 40 min and monitored by TLC. After the reaction was completed, the reaction mixture was cooled to complete the precipitation. The crude product was filtered, washed with water and recrystallized from ethanol to give 4 (4.26 g, yield: 71.06 %) as a yellow solid. <sup>1</sup>H NMR (400 MHz, CDCl<sub>3</sub>): δ 8.65 (d, *J* = 8.0 Hz, 1 H), 8.55 (d, *J* = 7.6 Hz, 1 H), 8.40 (d, *J* = 8.0 Hz, 1 H), 8.03 (d, *J* = 7.2 Hz, 1 H), 7.81-7.86 (m, 1 H), 4.17 (t, *J* = 8.0 Hz, 2 H), 1.68-1.75 (m, 2 H), 1.41-1.49 (m, 2 H), 0.98 (t, *J* = 7.2 Hz, 3 H)

***N*-butyl-4-(bis(2-hydroxyethyl)amino)-1,8-naphthalimide 1-2<sup>2</sup>:** Under an argon atmosphere, 1-3 (1.0 g, 3.0 mmol) and diethanolamine (5.0 mL, 52.0 mmol) were combined in 10 mL of 2-methoxyethanol and refluxed for overnight. Then the reaction mixture was poured into 50 mL water and extracted with ethyl acetate (50 mL × 3). The combined organic layer was dried and evaporated under reduced pressure. The residue was purified by column chromatography (silica gel, EtOAc as eluent) to give the yellow solid product (480.0 mg, Yield: 44.7 %). <sup>1</sup>H NMR (400 MHz, CDCl<sub>3</sub>): δ 8.87 (d, *J* = 8.0 Hz, 1 H), 8.56 (d, *J* = 7.2 Hz, 1 H), 8.49 (d, *J* = 8.0 Hz, 1 H), 7.69 (t, *J* = 7.2 Hz, 1 H), 7.40 (d, *J* = 8.0 Hz, 1 H), 4.16 (t, *J* = 7.2 Hz, 2 H), 3.85 (t, *J* = 4.8 Hz, 4 H), 3.61 (t, *J* = 5.2 Hz, 4 H), 1.74-1.66 (m, 2 H), 1.49-1.39 (m, 2 H), 0.97 (t, *J* = 7.6 Hz, 3 H)

***N*-butyl-4-(bis(2-chloroethyl)amino)-1,8-naphthalimide 1-1:** To a well-stirred solution of 1-2 (500 mg, 1.4 mmol) in CH<sub>2</sub>Cl<sub>2</sub> (20 mL) was added a solution of SOCl<sub>2</sub> (1.5 g, 12.6 mmol) in 20 mL CH<sub>2</sub>Cl<sub>2</sub> at 0 °C. The reaction mixture was stirred

for 30 min at 0 °C and then heated to reflux. After cooled to room temperature, the reaction mixture was concentrated under reduced pressure. The residue was purified by column chromatography (silica gel, petroleum ether /EtOAc = 4:1 as eluent) to give the yellow solid product (326.0 mg, Yield: 59.1 %). <sup>1</sup>H NMR (400 MHz, CDCl<sub>3</sub>): δ 8.61 (d, *J* = 7.2 Hz, 1 H), 8.55 (t, *J* = 8.0 Hz, 2 H), 7.75 (t, *J* = 7.6 Hz, 1 H), 7.46 (d, *J* = 8.0 Hz, 1 H), 4.18 (t, *J* = 7.2 Hz, 2 H), 3.80 (t, *J* = 6.4 Hz, 4 H), 3.59 (t, *J* = 6.4 Hz, 4 H), 1.75-1.68 (m, 2 H), 1.48-1.42 (m, 2 H), 0.98 (t, *J* = 7.2 Hz, 3 H). <sup>13</sup>C NMR (100 MHz, CDCl<sub>3</sub>): δ 164.3, 163.8, 152.1, 131.6, 131.5, 130.2, 130.1, 128.2, 126.4, 123.4, 119.7, 118.6, 55.8, 41.3, 40.2, 30.2, 20.4, 13.8. ESI-MS (*m/z*): 393 (M+H<sup>+</sup>), mp: 97.6 - 98.7 °C

**2-(ethylthio)ethanethiol 2-1<sup>3</sup>:** Under an argon atmosphere, to the mixture of dithioglycol (6 mL, 71.5 mmol), NaOH (2.2 g, 55 mmol) in 70 mL of dry THF was added a solution of iodoethane (6 mL, 75.0 mmol) in 30 mL dry THF at reflux. After the addition was completed, the reaction mixture was refluxed for another 1 h. Then the reaction mixture was cooled to room temperature, and the solvent was removed under reduced pressure. The residue was dissolved in CH<sub>2</sub>Cl<sub>2</sub>, washed with water, dried over anhydrous Na<sub>2</sub>SO<sub>4</sub> and evaporated under reduced pressure to give the product as colorless oil.

***N*-butyl-4-(bis(2-((2-(ethylthio)ethyl)thio)ethyl)amino)-1,8-naphthalimide AN<sup>3</sup>:**

To a mixture of NaH (100 mg, 4.17 mmol) in 5 mL of dry DMF was slowly added a solution of 2-1 (200 mg, 1.85 mmol) in 2 mL of dry DMF. After the addition is completed, the mixture was stirred for half an hour. Then a solution of 1-1 (350 mg, 0.88 mmol) in dry DMF was added to above mixture and stirred for overnight. The reaction solution was poured into water, extracted with CH<sub>2</sub>Cl<sub>2</sub>, washed with water, dried over anhydrous Na<sub>2</sub>SO<sub>4</sub> and evaporated under reduced pressure. The crude product was purified by column chromatography (silica gel, petroleum ether /EtOAc/methanol = 10:2:1 as eluent) to give the yellow oil product. <sup>1</sup>H NMR (400 MHz, CDCl<sub>3</sub>): δ 8.59 (d, *J* = 6.4 Hz, 1 H), 8.51 (d, *J* = 8.0 Hz, 2 H), 7.72 (t, *J* = 7.2 Hz, 1 H), 7.33 (d, *J* = 8.0 Hz, 1 H), 4.17 (t, *J* = 7.6 Hz, 2 H), 3.61 (t, *J* = 7.2 Hz, 4 H), 2.73 (t, *J* = 7.2 Hz, 4 H), 2.64-2.61 (overlapped, 8 H), 2.46 (q, *J* = 7.2 Hz, 4 H), 1.74-1.66 (m, 2H), 1.49-1.39 (m, 2H), 1.18 (t, *J* = 7.2 Hz, 6 H), 0.97 (t, *J* = 7.6 Hz, 3 H). <sup>13</sup>C NMR (100 MHz, CDCl<sub>3</sub>): δ 164.3, 163.8, 153.0, 131.6, 131.4, 130.4, 130.1, 127.6, 126.0, 123.3, 118.1, 117.5, 53.6, 40.1, 32.4, 31.7, 30.2, 29.7, 26.6, 20.4, 14.7, 13.9. HRMS (ESI): Calcd for C<sub>28</sub>H<sub>40</sub>N<sub>2</sub>O<sub>2</sub>S<sub>4</sub> (M+H<sup>+</sup>) 565.2051; Found, 565.2047

### 3. Methods

#### 3.1 Spectroscopic materials and methods

Double distilled water was used to prepare all aqueous solutions. All spectroscopic measurements were performed in 50 mM HEPES buffer (pH 7.4, 1% DMSO) at room temperature. Absorption spectra were recorded using a Varian Cary100 Bio UV-Visible spectrophotometer. Fluorescence spectra were recorded using a Varian Cary Eclipse scanning spectrofluorometer equipped with a Xenon flash lamp. Samples for absorption and fluorescence measurements were contained in 1 cm×1 cm quartz cuvettes (3.5 mL volume).

#### 3.2 Job plot

A series of solutions containing AN and Ag<sup>+</sup> were prepared such that the sum of the total metal ion and AN concentration remained constant (9 μM). The mole fraction (*x*) of metal ion was varied from 0.1 to 1.0. The corrected fluorescence (*Y*<sub>0</sub> (1-*x*)-*Y*) was plotted against the molar fraction of the metal ion solution, where *Y*<sub>0</sub> and *Y* represent the emission intensity at 520 nm in the absence and presence of Ag<sup>+</sup>, respectively.

#### 3.3 Detection of association constant

Association constants were investigated by fluorescence titrations. The concentration of Ag<sup>+</sup> ion was varied between zero and 1.8 μM. AN was maintained at 9 μM throughout the study. The fluorescence at 520 nm was monitored as the concentration of metal ion varied. The 1:1 complexation constant *K*<sub>s</sub> was determined by a nonlinear least-squares analysis of *Y* versus *C*<sub>M</sub> using the following equation as:

$$Y = Y_0 + \frac{Y_{lim} - Y_0}{2} \left\{ 1 + \frac{C_M}{C_L} + \frac{1}{K_s C_L} - \left[ \left( 1 + \frac{C_M}{C_L} + \frac{1}{K_s C_L} \right)^2 - 4 \frac{C_M}{C_L} \right]^{1/2} \right\}$$

Where *Y*<sub>0</sub> and *Y* represent the emission intensity at 520 nm in the absence and presence of metal ion, respectively, *Y*<sub>lim</sub> is the emission response when no further change occurred upon continued addition of metals, *C*<sub>L</sub> is the concentration of AN and *C*<sub>M</sub> represents the total metal ion concentration.

#### 3.4 Determination of quantum yield

The quantum yield of AN and ANAg<sup>+</sup> were determined in 1% DMSO/H<sub>2</sub>O according to the comparative method.<sup>4</sup>

$$\Phi_T = \Phi_{ST} \left( \frac{\text{Grad}_T}{\text{Grad}_{ST}} \right) \left( \frac{\eta_T^2}{\eta_{ST}^2} \right)$$

Where  $\Phi$  is the quantum yield. Grad is the slope of the line obtained from the plot of the integrated fluorescence intensity vs. absorbance.  $\eta$  refers to the refractive index of the solvent. The subscripts T and ST denote the tested samples and the standard sample, respectively. N-butyl-4-butylamino-1,8-naphthalimid was chosen as the standard sample, which has the quantum yield of 0.81 in CHCl<sub>3</sub>.

### 3.5 Detection limit

The detection limit was calculated based on the fluorescence titration. The fluorescence enhancement of AN was dose-dependent with respect to I<sup>-</sup>. The linear response ( $y = 8.879 \times 10^7 x + 26.80$  with  $R^2 = 0.9972$ ) of fluorescent intensity ( $y$ ) with respect to the concentration ( $x$ ) of I<sup>-</sup> was established. The lower detection limit (LDL) was calculated following equation.  $\text{LDL} = 3\sigma/\text{slope}$  ( $\sigma$  denotes the ratio signal and noise, which is the standard deviation of blank measurements,  $n = 10$ ; slope refers to the slope of linear equation). The detection limit was determined to be 17.2 nM.

### 3.6 Detection iodide in real samples with ANAg

3g salt sample was treated with approximate 10 equiv. Vc in aqueous solution at room temperature, then the solvent was removed, and 30mL EtOH was added to extract the I<sup>-</sup> for 4 hs. 6 mL extraction was concentrated and dissolved in 2 mL Mill-Q water. The solution was used for iodide test.

## 4. Data

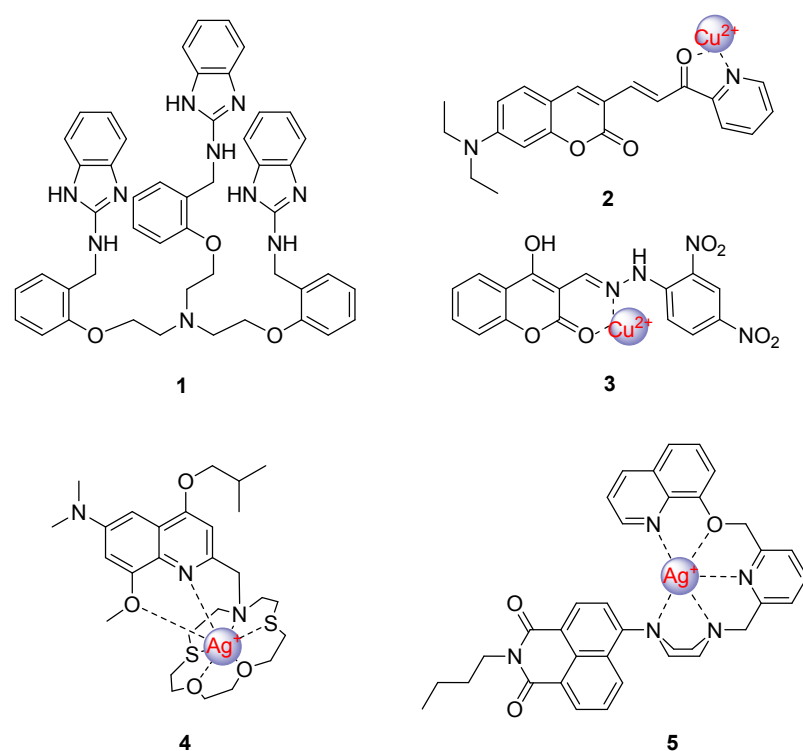

**Fig. S1** Structures of reported probes for I<sup>-</sup>

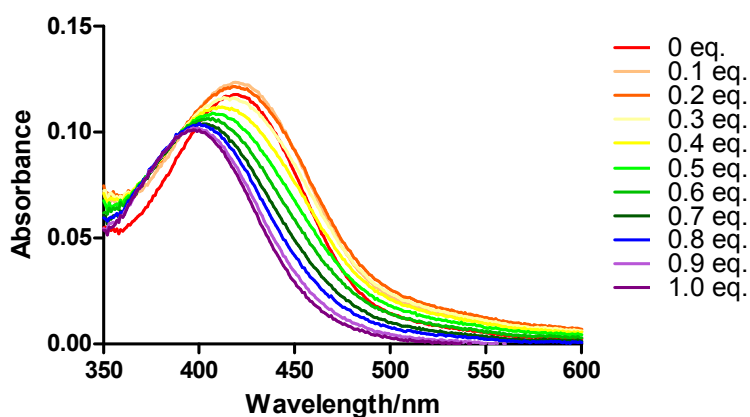

**Fig. S2** The UV absorption spectra of probe AN (9 μM) upon addition of increasing concentration of Ag<sup>+</sup> (0 to 1.0 equiv) in HEPES buffer (pH 7.4, 50 mM, 1% DMSO).

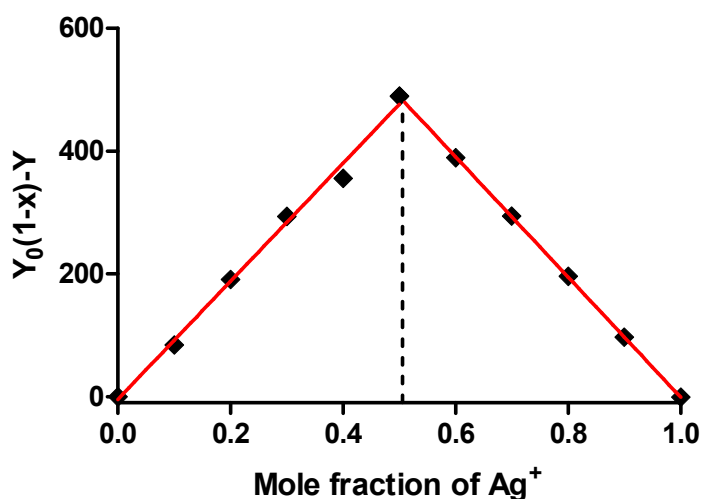

**Fig. S3** Job's plot of AN and Ag<sup>+</sup> ([AN] + [Ag<sup>+</sup>] = 10 μM) in aqueous solution (HEPES, pH 7.4, 50 mM, 1% DMSO). Excitation at 420 nm. Excitation and emission slit widths were both 5 nm.

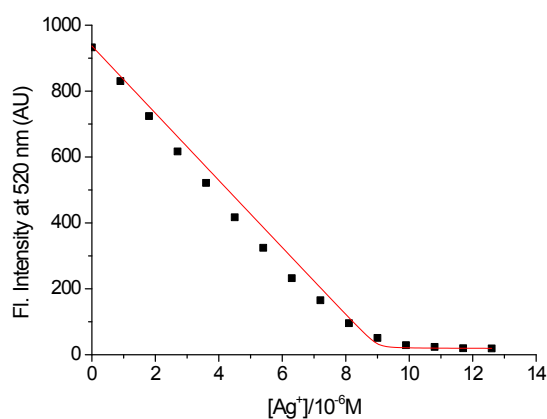

**Fig. S4** Curve of fluorescence intensity at 520nm of AN versus increasing concentration of Ag<sup>+</sup> in HEPES buffer (pH 7.4, 50 mM, 1% DMSO). The concentration of AN was 9μM. Excitation at

420 nm. Excitation and emission slit widths were both 5 nm.

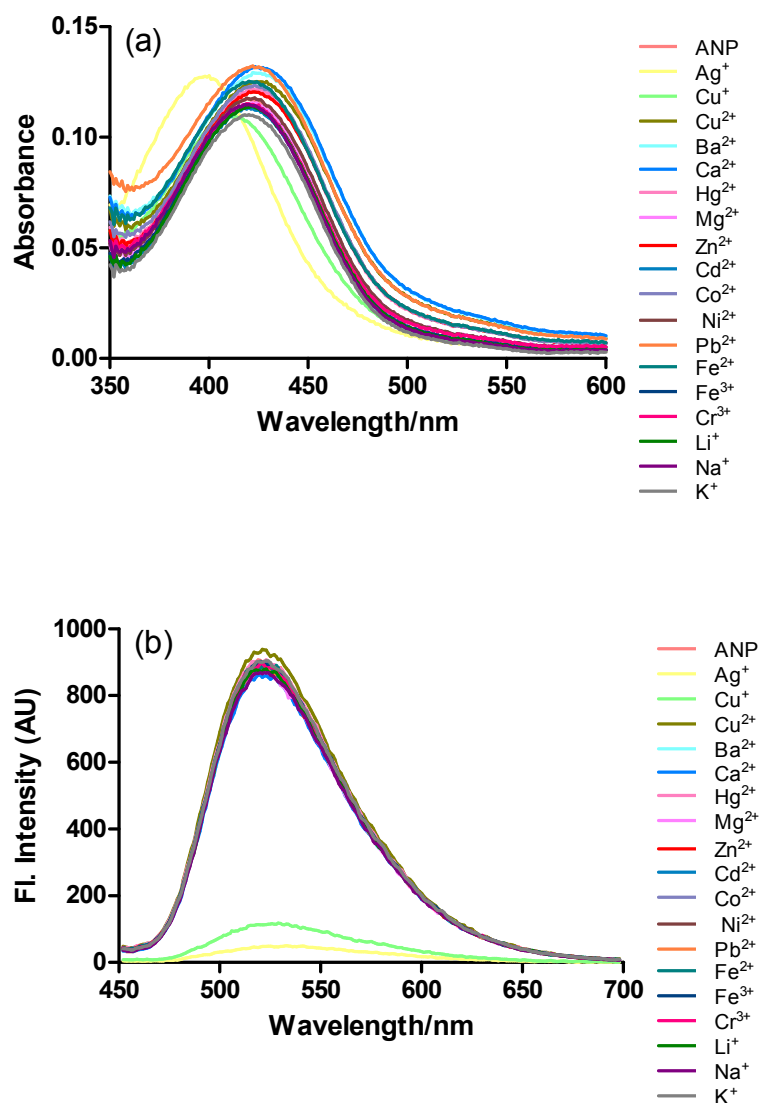

**Fig. S5** The UV absorption spectra and fluorescent emission spectra of probe AN (9  $\mu$ M) upon addition of various metal ions (1.0 eq.) in HEPES buffer (pH 7.4, 50 mM, 1% DMSO). Excitation at 420 nm. Excitation and emission slit widths were both 5 nm.

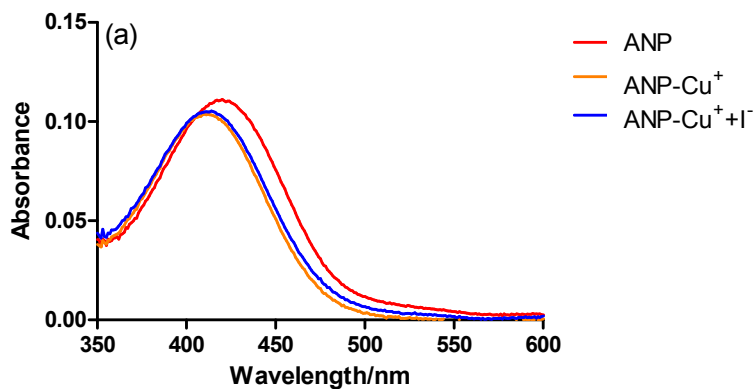

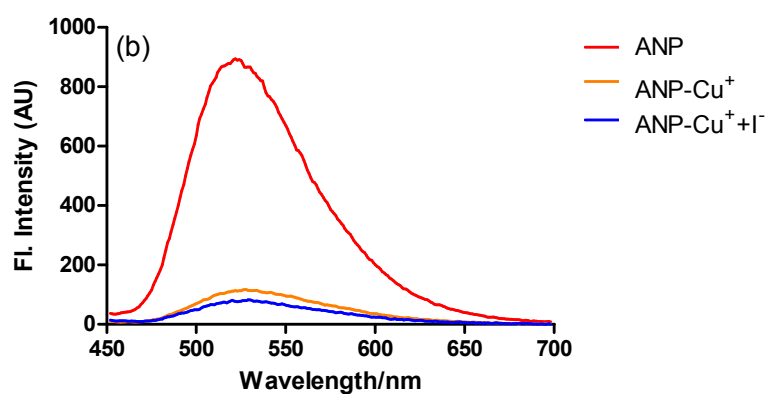

**Fig. S6** The UV absorption spectra and fluorescent emission spectra of AN (9  $\mu\text{M}$ ), and ANCu (9  $\mu\text{M}$ ) upon addition of I<sup>-</sup> (0 and 1.0 eq.) in HEPES buffer (pH 7.4, 50 mM, 1% DMSO). Excitation at 420 nm. Excitation and emission slit widths were both 5 nm.

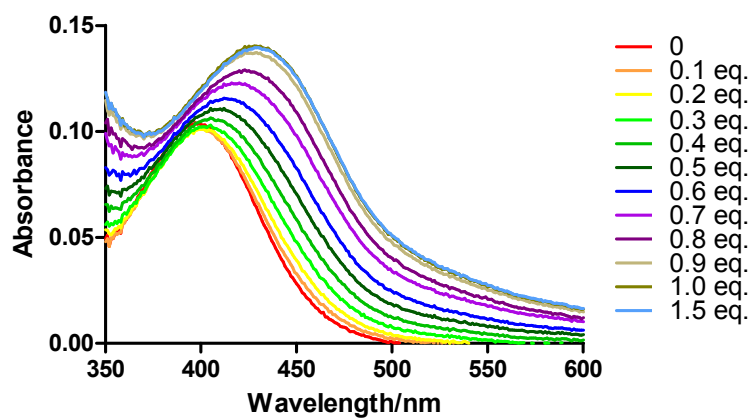

**Fig. S7** The UV absorption spectra of probe ANAg complex (9  $\mu\text{M}$ ) upon addition of increasing concentration of I<sup>-</sup> (0 to 1.5 eq.) in HEPES buffer (pH 7.4, 50 mM, 1% DMSO).



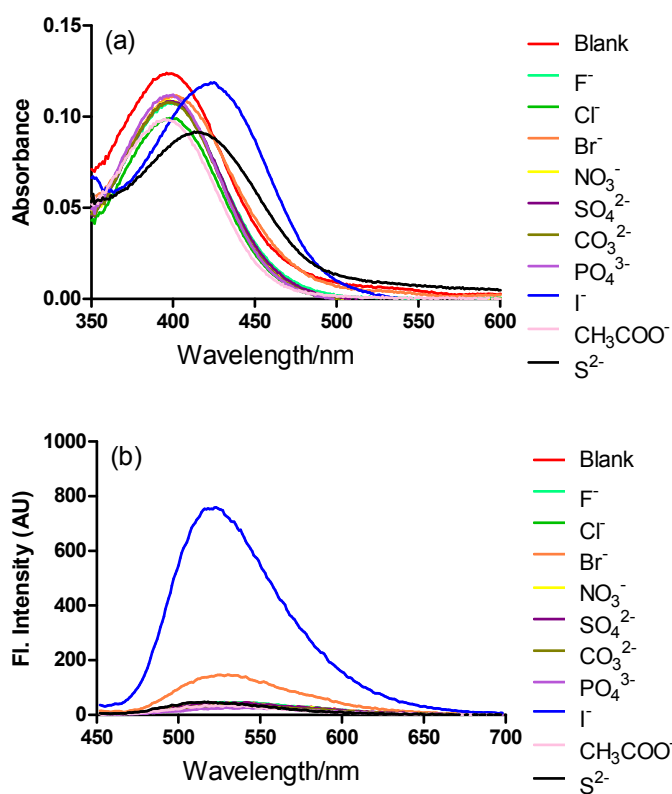

**Fig. S8** The UV absorption spectra and fluorescent emission spectra of probe ANAg (9  $\mu\text{M}$ ) upon addition of various anions (1.0 equiv) in HEPES buffer (pH 7.4, 50 mM, 1% DMSO). Excitation at 420 nm. Excitation and emission slit widths were both 5 nm.

### 5 The characterization data of AN

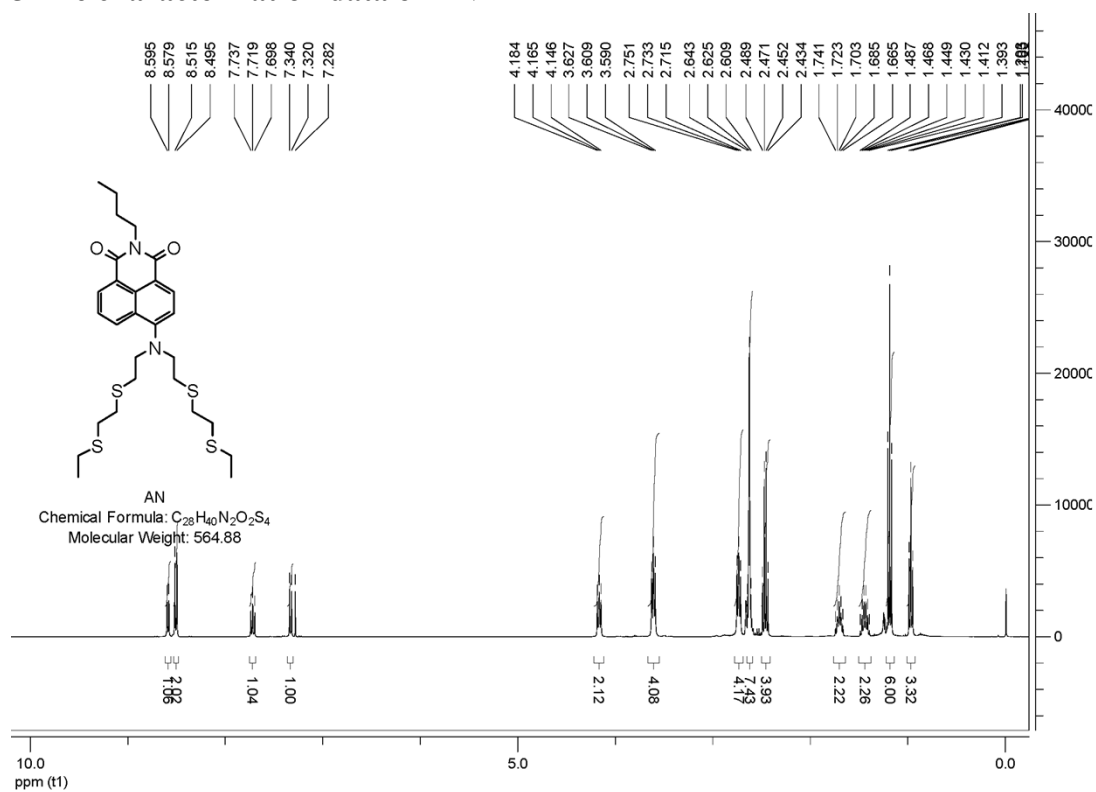

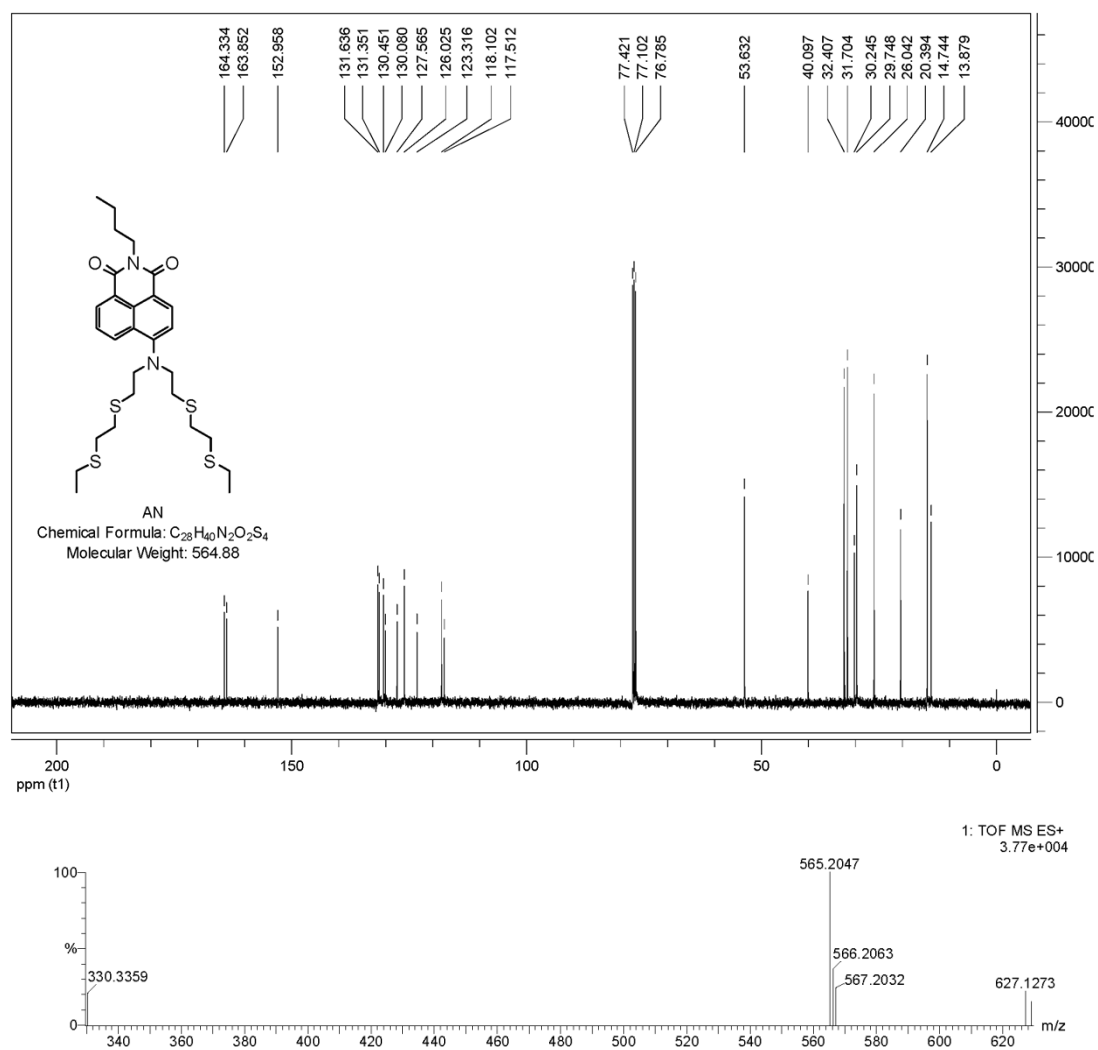

**Fig. S9** The <sup>1</sup>H-NMR spectra, <sup>13</sup>C-NMR spectra and HRMS spectra of AN

## 6. References

- 1 Z. Xu, X. Qian and J. Cui, *Org. Let.*, 2005, **7**, 3029.
- 2 J. Huang, Y. Xu and X. Qian, *Org. Biomol. Chem.*, 2009, **7**, 1299.
- 3 M. Tanaka, M. Nakamura, T. Ikeda, K. Ikeda, H. Ando, Y. Shibutani, S. Yajima and K. Kimura, *J. Org. Chem.*, 2001, **66**, 7008.
- 4 A. T. R. Williams, S. A. Winfield and J. N. Miller, *Analyst.*, 1983, **108**, 1067.
